# Supplementary material for: Identifying potential survival strategies of HIV-1 through virus-host protein interaction networks
Source: Springer Nature journal article supplement (doi:10.1186/1752-0509-4-96), 2010-07-15
Supplement: Additional file 8 [file 1752-0509-4-96-s8.pdf]

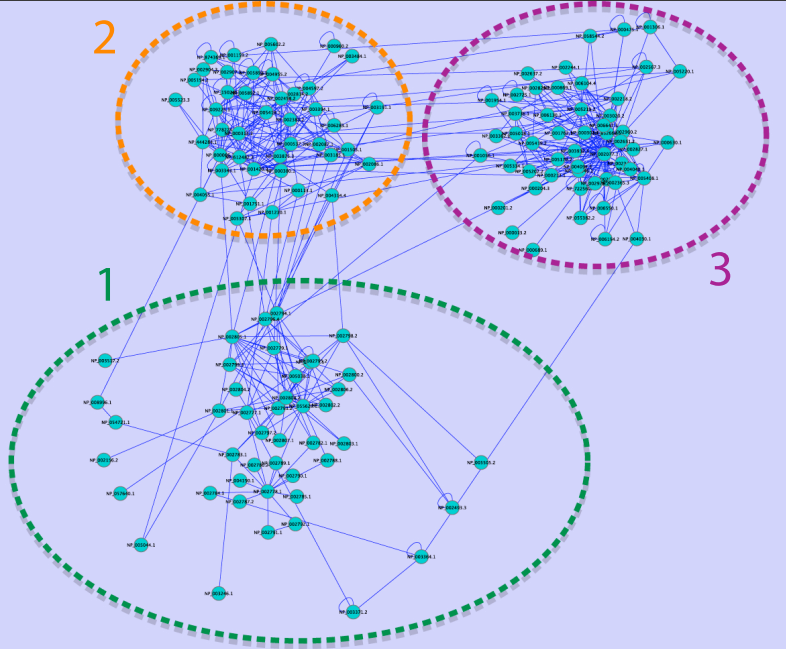

The visualization of the proteasomal network with their first and second neighbors. Resulting network consists of three distinct clusters. 1) The first cluster consists of only proteasomal proteins. 2) Second cluster is associated with regulation of metabolic process (80 percent of all proteins), and regulation of progression through cell cycle (49 percent of all proteins). The members of this cluster are proteins from highly connected oncogenes Tp53, Tp73, Brca-1 and Rb1. 3) The third cluster is associated with signal transduction and cell communication (both 78 percent).
